# Supplementary material
Source: MDPI journal article supplement (https://www.mdpi.com/2073-4395/8/7/108)
Supplement: s1 [file s1]

## Supporting Information S. 1

### The tested samples washing method before DNA extraction.

The detailed sampling procedure was as follows:

- 1) Loose soil attached to roots aseptically.
- 2) Whole plant were placed into clean and sterile beaker, with containing 1/3 volume PBS phosphate buffer (per litre: 6.33 g of  $\text{NaH}_2\text{PO}_4 \cdot \text{H}_2\text{O}$ , 16.5g of  $\text{Na}_2\text{HPO}_4 \cdot 7\text{H}_2\text{O}$ , 200  $\mu\text{l}$  Silwet L-77).
- 3) Gently shake the beaker, until the soil from plants were released most.
- 4) The whole plant were then sonicated in asepsis condition at low frequency for 1 min (five 30-s bursts followed by five 30-s rests), which further disrupted tiny soil aggregates and attached microbes.
- 5) Wiping whole body of plants with 75% alcohol, under the asepsis conditions
- 5) Again showered the plant body by sterilized PBS buffer carefully, repeat this step 6 for five times.
- 6) Finally showered the plant with DD water, and collect the final buffer.
- 7) Centrifuge the final buffer at 1000g 4°C, Supernatant were collected for an AODC test.

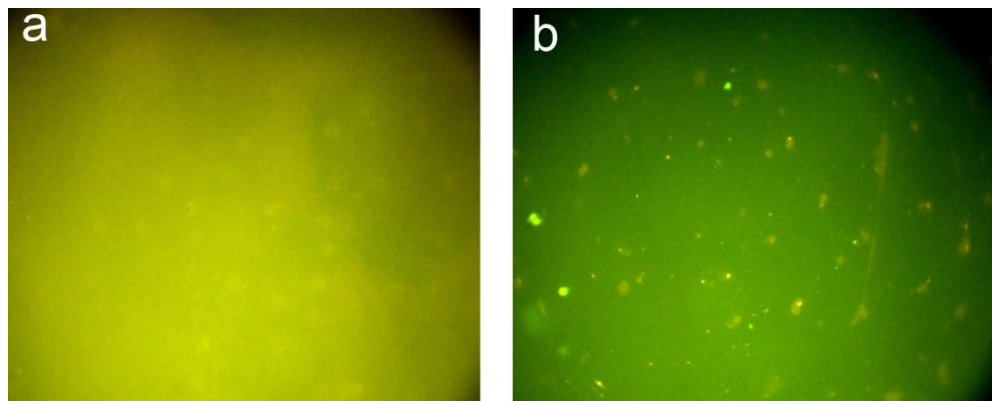

**Supplementary Fig. S1** Photos of the wash buffer scanning by AODC. (a): The final wash buffer showed no bacterial signal were detected. (b): Buffer from the first flushing, each bright spot represented a bacteria cell.

**Supplementary Table S1** General features of the 16s rDNA sequencing.

| Sample ID | Raw reads | Clean reads | No. of OTU97 | No. of genera | No. of family | No. of order | No. of class | No. of phylum | Good's coverage | Chao1  | Shannon |
|-----------|-----------|-------------|--------------|---------------|---------------|--------------|--------------|---------------|-----------------|--------|---------|
| FL1       | 30953     | 22402       | 505          | 226           | 150           | 85           | 43           | 19            | 0.98            | 657.0  | 5.1     |
| FL2       | 38027     | 27483       | 531          | 264           | 179           | 100          | 47           | 20            | 0.98            | 719.1  | 5.3     |
| FL3       | 35286     | 25562       | 527          | 248           | 168           | 100          | 50           | 22            | 0.98            | 682.0  | 5.1     |
| FR1       | 44897     | 33320       | 484          | 251           | 163           | 83           | 41           | 20            | 0.99            | 544.9  | 5.6     |
| FR2       | 40567     | 30233       | 591          | 259           | 163           | 83           | 38           | 18            | 0.99            | 494.4  | 5.8     |
| FR3       | 45598     | 33315       | 560          | 265           | 170           | 87           | 41           | 19            | 0.99            | 557.4  | 5.8     |
| FS1       | 32373     | 24656       | 401          | 220           | 134           | 75           | 36           | 17            | 0.99            | 467.1  | 5.7     |
| FS2       | 30598     | 22939       | 402          | 222           | 142           | 82           | 44           | 18            | 0.99            | 513.3  | 5.5     |
| FS3       | 33914     | 25790       | 416          | 225           | 135           | 72           | 39           | 18            | 0.99            | 412.3  | 5.5     |
| AL1       | 29375     | 25287       | 288          | 139           | 90            | 48           | 22           | 12            | 0.99            | 249.4  | 2.3     |
| AL2       | 38866     | 34204       | 296          | 149           | 98            | 53           | 27           | 14            | 0.99            | 258.5  | 2.2     |
| AL3       | 28163     | 23239       | 263          | 128           | 90            | 52           | 23           | 11            | 0.99            | 278.0  | 2.3     |
| AR1       | 46669     | 39565       | 227          | 153           | 109           | 57           | 26           | 12            | 0.99            | 268.1  | 2.3     |
| AR2       | 42615     | 36394       | 243          | 165           | 109           | 62           | 30           | 14            | 0.99            | 292.0  | 2.4     |
| AR3       | 39729     | 32355       | 206          | 155           | 108           | 58           | 25           | 13            | 0.99            | 260.6  | 2.6     |
| AS1       | 22767     | 16528       | 456          | 231           | 155           | 86           | 44           | 19            | 0.98            | 732.5  | 2.6     |
| AS2       | 25851     | 18032       | 577          | 266           | 180           | 99           | 51           | 22            | 0.97            | 833.3  | 3.0     |
| AS3       | 24862     | 17564       | 507          | 248           | 167           | 91           | 42           | 20            | 0.98            | 755.1  | 2.7     |
| S1        | 75658     | 63774       | 1339         | 398           | 271           | 144          | 67           | 26            | 0.97            | 1299.1 | 8.6     |
| S2        | 97099     | 82300       | 1387         | 405           | 276           | 147          | 68           | 27            | 0.97            | 1350.1 | 8.7     |
| S3        | 94753     | 80482       | 1401         | 409           | 277           | 143          | 66           | 26            | 0.97            | 1308.9 | 8.7     |

**Supplementary Table S2** Observed OTUs of the whole plant soybean endophytic denitrifying bacteria.

|                           | F1   | F2   | F3   | A1   | A2  | A3  | S1  | S2  | S3  |
|---------------------------|------|------|------|------|-----|-----|-----|-----|-----|
| <i>Pseudomonas</i>        | 120  | 50   | 294  | 657  | 474 | 263 | 8   | 8   | 9   |
| <i>Arthrobacter</i>       | 17   | 14   | 21   | 27   | 23  | 14  | 180 | 233 | 217 |
| <i>Acinetobacter</i>      | 3    | 3    | 9    | 36   | 8   | 20  | 0   | 1   | 4   |
| <i>Microbacterium</i>     | 141  | 147  | 698  | 44   | 26  | 23  | 10  | 15  | 8   |
| <i>Noviherbaspirillum</i> | 346  | 416  | 375  | 15   | 12  | 15  | 164 | 182 | 228 |
| <i>Leptospirillum</i>     | 0    | 0    | 0    | 0    | 0   | 0   | 17  | 7   | 13  |
| <i>Stenotrophomonas</i>   | 8    | 6    | 5    | 106  | 10  | 26  | 12  | 20  | 18  |
| <i>Sphingobacterium</i>   | 1    | 0    | 2    | 15   | 4   | 0   | 0   | 0   | 0   |
| <i>Bradyrhizobium</i>     | 4606 | 2354 | 2547 | 146  | 183 | 139 | 232 | 252 | 231 |
| <i>Propionibacterium</i>  | 3    | 1    | 4    | 86   | 55  | 42  | 0   | 0   | 0   |
| <i>Eubacterium</i>        | 0    | 0    | 0    | 22   | 63  | 35  | 0   | 0   | 0   |
| a total                   | 5245 | 2991 | 3955 | 1134 | 858 | 547 | 623 | 718 | 729 |

**Supplementary Table S3** Relative abundance of the soybean endophytic denitrifying bacteria and its distribution in different organs (%)

| OTU ID                    | F.leaf | F.root | F.stem | A.leaf | A.root | A.stem | BS     |
|---------------------------|--------|--------|--------|--------|--------|--------|--------|
| <i>Bradyrhizobium</i>     | 0.067% | 8.980% | 0.550% | 0.057% | 0.140% | 0.710% | 0.667% |
| <i>Noviherbaspirillum</i> | 1.013% | 0.237% | 0.397% | 0.020% | 0.003% | 0.097% | 0.527% |
| <i>Microbacterium</i>     | 0.407% | 0.093% | 3.223% | 0.053% | 0.050% | 0.023% | 0.027% |
| <i>Pseudomonas</i>        | 0.293% | 0.033% | 0.947% | 0.533% | 1.030% | 0.077% | 0.023% |
| <i>Arthrobacter</i>       | 0.033% | 0.003% | 0.033% | 0.013% | 0.030% | 0.057% | 0.477% |
| <i>Propionibacterium</i>  | 0.003% | 0.003% | 0.007% | 0.080% | 0.117% | 0.013% | 0.000% |
| <i>Acinetobacter</i>      | 0.013% | 0.000% | 0.017% | 0.070% | 0.030% | 0.020% | 0.007% |
| <i>Leptospirillum</i>     | 0.000% | 0.000% | 0.000% | 0.000% | 0.000% | 0.000% | 0.033% |
| <i>Stenotrophomonas</i>   | 0.000% | 0.000% | 0.000% | 0.053% | 0.103% | 0.000% | 0.050% |
| <i>Sphingobacterium</i>   | 0.000% | 0.000% | 0.040% | 0.020% | 0.003% | 0.003% | 0.000% |
| <i>Eubacterium</i>        | 0.000% | 0.000% | 0.000% | 0.057% | 0.043% | 0.000% | 0.000% |
